# Supplementary material for: Clinical and molecular parameters associated to pneumonitis development in non-small-cell lung cancer patients receiving chemoimmunotherapy from NADIM trial
Source: HighWire-hosted journal article supplement (doi:10.1136/jitc-2021-002804), 2021-08-01
Supplement: jitc-2021-002804supp002_data_supplement.xlsx [file jitc-2021-002804supp002_data_supplement.xlsx]

## Sheet: PRE
Patient ID	PNEUMONITIS_0vsOther	Hemoglobin PRE	Platelets PRE	Leucocytes PRE	Neutrophils PRE	Eosinophils PRE	Basophils PRE	Lymphocytes PRE	Monocytes PRE	LDH PRE	PLR PRE	PMR PRE	NLR PRE	dNLR PRE	MLR PRE	LIPI SCORE PRE
1	0	13.8	255	9.9	7.3	0.2	0.1	1.4	1.1	331	182.143	231.818	5.21429	2.80769	6.14286	0
2	0	18	259	8.5	6.7	0.3	0	1	0.6	335	259	431.667	6.7	3.72222	7.6	2
3	1	13	319	9.5	4.8	0.2	0.1	3.8	0.7	162	83.9474	455.714	1.26316	1.02128	1.5	0
6	0	13.8	296	5.9	3.8	0.2	0	1.6	0.3	245	185	986.667	2.375	1.80952	2.6875	0
7	0	14.9	268	8.6	3.9	0.2	0.1	3.5	0.5	196	76.5714	536	1.11429	0.829787	1.31429	0
9	1	13.2	191	7.2	4.6	0.2	0.1	1.7	0.7	168	112.353	272.857	2.70588	1.76923	3.23529	0
11	0	14.2	156	4.9	3.1	0.2	0.03	1.3	0.4	268	120	390	2.38462	1.72222	2.84615	0
12	0	16.2	323	7.3	4.3	0.2	0	2.2	0.4	163	146.818	807.5	1.95455	1.43333	2.22727	0
13	0	12.7	430	8.9	4.7	0.3	0.1	3.1	0.7	405	138.71	614.286	1.51613	1.11905	1.83871	1
14	0	11.7	331	7.9	5.1	0.4	0.1	1.4	0.9	318	236.429	367.778	3.64286	1.82143	4.57143	0
15	1	14.9	435	13.9	10.2	0.26	0.08	2.44	0.93	210	178.279	467.742	4.18033	2.75676	4.66803	0
16	0	12.9	272	6.59	3.68	0.08	0.04	2.33	0.46	206	116.738	591.304	1.5794	1.2646	1.81116	0
17	1	13.7	389	10.4	7.2	0.3	0.1	2.3	0.6	401	169.13	648.333	3.13043	2.25	3.52174	1
18	0	12.5	335	6.5	3.9	0.2	0	1.6	0.7	131	209.375	478.571	2.4375	1.5	3	0
19	0	15.2	317	9.81	5.45	0.31	0.09	3.24	0.72	181	97.8395	440.278	1.6821	1.25	2	0
20	1	14.8	275	8	3.77	0.53	0.09	2.8	0.79	186	98.2143	348.101	1.34643	0.891253	1.81786	0
21	0	12.4	536	14.2	11.2	0.4	0.1	1.8	0.7	220.4	297.778	765.714	6.22222	3.73333	6.83333	1
22	0	13.6	338	7.48	4.3	0	0.1	2.3	0.8	370	146.957	422.5	1.86957	1.3522	2.21739	1
23	0	14.9	286	11.26	8.04	0.28	0.05	2.14	0.75		133.645	381.333	3.75701	2.49689	4.23832
24	0	11	352	10.89	6.39	0.17	0.04	3.35	0.64	164	105.075	550	1.90746	1.42	2.14925	0
26	0	14.7	260	9.64	7.4	0	0.1	1.5	0.7	363	173.333	371.429	4.93333	3.30357	5.4	2
27	1	12.1	237	12.23	8.92	0.05	0.04	1.96	1.2	245	120.918	197.5	4.55102	2.69486	5.18878	0
28	0	14.5	212	12.3	8.32	0.36	0.09	3.03	0.51	162	69.967	415.686	2.74587	2.09045	3.033	0
29	1	14.9	408	8.62	5.4	0.2	0	2	1	355	204	408	2.7	1.67702	3.3	1
30	0	13.6	205	10.8	8.1	0	0	1.5	1.1	154	136.667	186.364	5.4	3	6.13333	1
31	0	14.1	340	11.8	9.3	0.17	0.02	1.4	1	175	242.857	340	6.64286	3.72	7.47857	1
32	1	14.5	122	7.3	4.68	0.1	0.02	1.86	0.54	275	65.5914	225.926	2.51613	1.78626	2.86022	0
33	0	14.6	160	5.98	3.7	0.2	0	1.6	0.5	348	100	320	2.3125	1.62281	2.75	1
34	0	8.9	778	8.84	6.89	0.09	0.04	1.29	0.35	159	603.101	2222.86	5.34109	3.53333	5.68217	1
35	1	10.8	128	5.59	1.86	0.15	0.01	2.04	1.23	198	62.7451	104.065	0.911765	0.49866	1.58824	0
36	1	17.2	194	7.18	3.56	0.09	0.02	2.92	0.59	399	66.4384	328.814	1.21918	0.983425	1.45205	1
37	0	14.7	383	7.22	4.15	0.23	0.05	2.05	0.74	255	186.829	517.568	2.02439	1.35179	2.49756	0
38	0	16.6	268	12.18	8.4	0.4	0.1	2.4	0.9	335	111.667	297.778	3.5	2.22222	4.04167	1
39	0	12.5	392	9.15	6.5	0.1	0	2	0.5	337	196	784	3.25	2.45283	3.55	1
40	0	15.9	255	8.76	3.4	0.4	0.1	3.8	1	470	67.1053	255	0.894737	0.634328	1.26316	1
42	0	15.3	197	9.17	4.7	0.1	0.1	3.7	0.4	171	53.2432	492.5	1.27027	1.05145	1.40541	0
43	0	12.4	255	10.45	5.81	0.3	0.06	3.24	0.6	146	78.7037	425	1.79321	1.25216	2.07099	0
44	0	14.4	386	7.2	4.79	0.29	0.04	1.2	0.82	318	321.667	470.732	3.99167	1.98755	4.91667	0
45	1	15.6	223	11.59	7.2	0.5	0.1	2.4	1.4	385	92.9167	159.286	3	1.64009	3.79167	1
46	0	14.1	330	10.93	7.48	0.61	0.06	2.17	0.61	190	152.074	540.984	3.447	2.16812	4.00922	0
47	0	13.8	307	7.97	6.05	0.21	0.04	1.13	0.47	231	271.681	653.191	5.35398	3.15104	5.95575	1
48	1	15.4	214	9	6.45	0.31	0.04	1.53	0.7	192	139.869	305.714	4.21569	2.52941	4.87582	0
49	0	14.5	251	7.32	4.2	0.2	0.1	2.1	0.7	526	119.524	358.571	2	1.34615	2.42857	1
50	0	16	358	6.3	3.6	0.04	0.02	2.16	0.48	182	165.741	745.833	1.66667	1.33333	1.90741	0
51	0	12.4	400	10.5	6.94	0.4	0.09	1.75	1.35	174	228.571	296.296	3.96571	1.94944	4.96571	0
52	0	13.6	229	9.6	5.51	0.3	0	2.8	1	213	81.7857	229	1.96786	1.34719	2.43214	0
	P VALUES	0.581746	0.146743	0.940174	0.880676	0.979874	0.827597	0.347977	0.0789254	0.52104	0.0540789	0.0115179	0.51543	0.452972	0.565048	1

## Sheet: POST
Patient ID	PNEUMONITIS_0vsOther	Hemoglobin POST	Platelets POST	Leucocytes POST	Neutrophils POST	Eosinophils POST	Basophils POST	Lymphocytes POST	Monocytes POST	LDH POST	PLR POST	PMR POST	NLR POST	dNLR POST	MLR POST	LIPI SCORE POST
1	0	10.5	91	4.7	2.7	0	0	1.5	0.5		60.6667	0	1.8	1.35	2.13333
2	0	15.5	185	5.6	3	0.1	0	1.8	0.6	375	102.778	0.0333333	1.66667	1.15385	2.05556	1
3	1	11.1	201	8.1	4.2	0.06	0.02	3.1	0.7	198	64.8387	0.0142857	1.35484	1.07692	1.6	0
6	0	12	255	5.3	2.9	0.1	0.1	1.8	0.3	230	141.667	0.0344828	1.61111	1.20833	1.83333	0
7	0	12.7	144	9.8	4.8	0.1	0	4	0.6	218	36	0.0208333	1.2	0.96	1.375	0
9	1	10.8	144	3.9	1.9	0.1	0.03	1.5	0.46	195	96	0.0526316	1.26667	0.95	1.64	0
11	0	12.3	151	4.29	2.5	0.05	0.03	1.19	0.52	366	126.891	0.02	2.10084	1.39665	2.57983	1
12	0	14.6	181	6.1	3.1	0.1	0	2.3	0.3	178	78.6957	0.0322581	1.34783	1.03333	1.52174	0
13	0	12.2	400	5.1	2.6	0	0.1	1.7	0.7	343	235.294	0	1.52941	1.04	1.94118	1
14	0	10.8	267	4.5	2.7	0.1	0.1	1.1	0.5	333	242.727	0.037037	2.45455	1.5	3	1
15	1	13.9	268	6.8	3.39	0.11	0.04	2.82	0.49	192	95.0355	0.0324484	1.20213	0.994135	1.41489	0
16	0	12.5	403	9.66	5.03	0.06	0.07	3.67	0.83	157	109.809	0.0119284	1.37057	1.08639	1.61308	0
17	1	13.6	242	10.91	8.2	0.1	0	2	0.6	392	121	0.0121951	4.1	3.02583	4.45	2
18	0
19	0	14.2	287	9.6	4.32	2.29	0.09	2.06	0.84	211	139.32	0.530093	2.09709	0.818182	3.6165	0
20	1	13.2	323	7.5	3.38	0.38	0.17	2.75	0.83	204	117.455	0.112426	1.22909	0.820388	1.66909	0
21	0	11.1	267	6.9	3.4	0.2	0.1	2.5	0.8	165.5	106.8	0.0588235	1.36	0.971429	1.76	0
22	0	13.6	251	5.93	2.7	0	0.1	2.5	0.6	300	100.4	0	1.08	0.835913	1.32	0
23	0	12	364	9.8	5.15	0.04	0.05	3.65	0.91	301	99.726	0.00776699	1.41096	1.10753	1.67123	0
24	0	10.9	168	5.99	3.15	0.04	0.02	2.27	0.35	154	74.0088	0.0126984	1.38767	1.10915	1.55947	0
26	0	12.3	152	6.38	4	0	0	1.6	0.8	400	95	0	2.5	1.68067	3	1
27	1	9.3	190	8.19	4.99	0.03	0.02	2.45	0.59	212	77.551	0.00601202	2.03673	1.55938	2.2898	0
28	0	12.6	190	4.9	1.88	0.07	0.05	2.62	0.28	138	72.5191	0.037234	0.717557	0.622517	0.851145	0
29	1	14.1	212	7.71	4.6	0.1	0	1.8	1.3	461	117.778	0.0217391	2.55556	1.4791	3.33333	1
30	0	12.9	280	6.24	4.93	0	0.01	0.81	0.49	180	345.679	0	6.08642	3.76336	6.69136	1
31	0	11.4	251	5.16	3.3	0.01	0.02	1.4	0.4	204	179.286	0.0030303	2.35714	1.77419	2.65	0
32	1	11.9	150	8.3	4.92	0.02	0.03	2.72	0.53	341	55.1471	0.00406504	1.80882	1.45562	2.01103	1
33	0	12	110	5.71	3.1	0.2	0	2	0.4	349	55	0.0645161	1.55	1.18774	1.85	1
34	0	10.6	396	4.55	2.22	0.08	0.05	1.85	0.22	171	214.054	0.036036	1.2	0.95279	1.36216	0
35	1	11.1	285	5.95	3.57	0.06	0	1.61	0.77	120	177.019	0.0168067	2.21739	1.5	2.73292	0
36	1	14	79	4.64	1.88	0	0.01	2.51	0.24	359	31.4741	0	0.749004	0.681159	0.844622	1
37	0	14.1	314	5.95	3.03	0.03	0.04	1.98	0.87	323	158.586	0.00990099	1.5303	1.03767	1.98485	0
38	0	16.3	235	7.34	4.3	0	0.1	2.2	0.7	360	106.818	0	1.95455	1.41447	2.27273	1
39	0	11.4	209	4.09	1.7	0	0	2.1	0.2	352	99.5238	0	0.809524	0.711297	0.904762	1
40	0	14.4	282	9.46	4.4	0.3	0.1	3.4	1.3	351	82.9412	0.0681818	1.29412	0.869565	1.76471	1
42	0	13.8	149	7.13	3.2	0	0	3.3	0.3	206	45.1515	0	0.969697	0.814249	1.06061	0
43	0	10.3	95	7.08	3.13	0	0.04	3.06	0.39	179	31.0458	0	1.02288	0.792405	1.15033	0
44	0	13.3	258	4.23	2.52	0.09	0.07	1.03	0.45	334	250.485	0.0357143	2.4466	1.47368	2.97087	1
45	1	13	182	8.96	4.5	0.1	0.1	3.2	1.2	423	56.875	0.0222222	1.40625	1.00897	1.8125	1
46	0	11.8	190	7.96	4.75	0.5	0.05	2.02	0.64	147	94.0594	0.105263	2.35149	1.47975	2.91584	0
47	0	12	265	2.61	1.2	0.05	0.02	1	0.24	271	265	0.0416667	1.2	0.851064	1.49	0
48	1	13.2	203	7.1	4.41	0.24	0.04	1.62	0.81	180	125.309	0.0544218	2.72222	1.63941	3.37037	0
49	0	13	285	4.33	1.8	0.1	0.2	1.7	0.7	731	167.647	0.0555556	1.05882	0.711462	1.52941	1
50	0	14.1	140	6.42	3.32	0.03	0.03	2.38	0.66		58.8235	0.00903614	1.39496	1.07097	1.68487
51	0	12.4	222	5.4	2.34	0.37	0.1	1.73	0.83	192	128.324	0.15812	1.3526	0.764706	2.04624	0
52	0	11.7	193	7	3.7	0.1	0	2.2	1	225	87.7273	0.027027	1.68182	1.12121	2.18182	0
	P VALUES	0.969	0.504	0.063	0.041	0.28	0.404	0.317	0.275	0.835	0.27	0.095	0.441	0.311	0.505	0.271

## Sheet: POST-PRE
Patient ID	PNEUMONITIS_0vsOther	Hemoglobin DIF	Platelets DIF	Leucocytes DIF	Neutrophils DIF	Eosinophils DIF	Basophils DIF	Lymphocytes DIF	Monocytes DIF	LDH DIF	PLR DIF	PMR DIF	NLR DIF	dNLR DIF	MLR DIF
1	0	3.3	164	5.2	4.6	0.2	0.1	0.1	0.6		121.476	49.8182	3.41429	1.45769	4.00952
2	0	2.5	74	2.9	3.7	0.2	0	0.8	0	40	156.222	123.333	5.03333	2.56838	5.54444
3	1	1.9	118	1.4	0.6	0.14	0.08	0.7	0	36	19.1087	168.571	0.0916808	0.0556465	0.1
6	0	1.8	41	0.6	0.9	0.1	0.1	0.2	0	15	43.3333	136.667	0.763889	0.60119	0.854167
7	0	2.2	124	1.2	0.9	0.1	0.1	0.5	0.1	22	40.5714	296	0.0857143	0.130213	0.0607143
9	1	2.4	47	3.3	2.7	0.1	0.07	0.2	0.24	27	16.3529	40.1863	1.43922	0.819231	1.59529
11	0	1.9	5	0.61	0.6	0.15	0	0.11	0.12	98	6.89076	99.6154	0.283775	0.325574	0.266322
12	0	1.6	142	1.2	1.2	0.1	0	0.1	0.1	15	68.1225	204.167	0.606719	0.4	0.705534
13	0	0.5	30	3.8	2.1	0.3	0	1.4	0	62	96.5844	42.8571	0.0132827	0.0790476	0.102467
14	0	0.9	64	3.4	2.4	0.3	0	0.3	0.4	15	6.2987	166.222	1.18831	0.321429	1.57143
15	1	1	167	7.1	6.81	0.15	0.04	0.38	0.44	18	83.2432	79.1968	2.9782	1.76262	3.25314
16	0	0.4	131	3.07	1.35	0.02	0.03	1.34	0.37	49	6.92893	105.762	0.208827	0.178212	0.19808
17	1	0.1	147	0.51	1	0.2	0.1	0.3	0	9	48.1304	245	0.969565	0.77583	0.928261
18	0
19	0	1	30	0.21	1.13	1.98	0	1.18	0.12	30	41.4809	98.6111	0.414989	0.431818	1.6165
20	1	1.6	48	0.5	0.39	0.15	0.08	0.05	0.04	18	19.2403	41.0554	0.117338	0.0708646	0.148766
21	0	-1.3	-269	-7.3	-7.8	-0.2	0	0.7	0.1	-54.9	-190.978	-431.964	-4.86222	-2.7619	-5.07333
22	0	0	-87	-1.55	-1.6	0	0	0.2	-0.2	-70	-46.5565	-4.16667	-0.789565	-0.516288	-0.897391
23	0	-2.9	78	-1.46	-2.89	-0.24	0	1.51	0.16		-33.9188	18.6667	-2.34605	-1.38937	-2.56708
24	0	-0.1	-184	-4.9	-3.24	-0.13	-0.02	-1.08	-0.29	-10	-31.0658	-70	-0.519797	-0.310845	-0.589782
26	0	-2.4	-108	-3.26	-3.4	0	-0.1	0.1	0.1	37	-78.3333	-181.429	-2.43333	-1.6229	-2.4
27	1	-2.8	-47	-4.04	-3.93	-0.02	-0.02	0.49	-0.61	-33	-43.3673	124.534	-2.51429	-1.13549	-2.89898
28	0	-1.9	-22	-7.4	-6.44	-0.29	-0.04	-0.41	-0.23	-24	2.55209	262.885	-2.02832	-1.46794	-2.18186
29	1	-0.8	-196	-0.91	-0.8	-0.1	0	-0.2	0.3	106	-86.2222	-244.923	-0.144444	-0.197919	0.0333333
30	0	-0.7	75	-4.56	-3.17	0	0.01	-0.69	-0.61	26	209.012	385.065	0.68642	0.763359	0.558025
31	0	-2.7	-89	-6.64	-6	-0.16	0	0	-0.6	29	-63.5714	287.5	-4.28571	-1.94581	-4.82857
32	1	-2.6	28	1	0.24	-0.08	0.01	0.86	-0.01	66	-10.4443	57.0929	-0.707306	-0.330638	-0.849186
33	0	-2.6	-50	-0.27	-0.6	0	0	0.4	-0.1	1	-45	-45	-0.7625	-0.435068	-0.9
34	0	1.7	-382	-4.29	-4.67	-0.01	0.01	0.56	-0.13	12	-389.047	-422.857	-4.14109	-2.58054	-4.32001
35	1	0.3	157	0.36	1.71	-0.09	-0.01	-0.43	-0.46	-78	114.274	266.065	1.30563	1.00134	1.14468
36	1	-3.2	-115	-2.54	-1.68	-0.09	-0.01	-0.41	-0.35	-40	-34.9643	0.353107	-0.470174	-0.302266	-0.607433
37	0	-0.6	-69	-1.27	-1.12	-0.2	-0.01	-0.07	0.13	68	-28.2434	-156.648	-0.494087	-0.31412	-0.512712
38	0	-0.3	-33	-4.84	-4.1	-0.4	0	-0.2	-0.2	25	-4.84848	37.9365	-1.54545	-0.807749	-1.76894
39	0	-1.1	-183	-5.06	-4.8	-0.1	0	0.1	-0.3	15	-96.4762	261	-2.44048	-1.74153	-2.64524
40	0	-1.5	27	0.7	1	-0.1	0	-0.4	0.3	-119	15.8359	-38.0769	0.399381	0.235237	0.501548
42	0	-1.5	-48	-2.04	-1.5	-0.1	-0.1	-0.4	-0.1	35	-8.09173	4.16667	-0.300573	-0.237205	-0.344799
43	0	-2.1	-160	-3.37	-2.68	-0.3	-0.02	-0.18	-0.21	33	-47.658	-181.41	-0.770334	-0.45975	-0.920661
44	0	-1.1	-128	-2.97	-2.27	-0.2	0.03	-0.17	-0.37	16	-71.1812	102.602	-1.54506	-0.513868	-1.94579
45	1	-2.6	-41	-2.63	-2.7	-0.4	0	0.8	-0.2	38	-36.0417	-7.61905	-1.59375	-0.631123	-1.97917
46	0	-2.3	-140	-2.97	-2.73	-0.11	-0.01	-0.15	0.03	-43	-58.0143	-244.109	-1.09552	-0.688365	-1.09338
47	0	-1.8	-42	-5.36	-4.85	-0.16	-0.02	-0.13	-0.23	40	-6.68142	450.975	-4.15398	-2.29998	-4.46575
48	1	-2.2	-11	-1.9	-2.04	-0.07	0	0.09	0.11	-12	-14.5606	-55.097	-1.49346	-0.890007	-1.50545
49	0	-1.5	34	-2.99	-2.4	-0.1	0.1	-0.4	0	205	48.1232	48.5714	-0.941176	-0.634691	-0.89916
50	0	-1.9	-218	0.12	-0.28	-0.01	0.01	0.22	0.18		-106.917	-533.712	-0.271709	-0.262366	-0.222533
51	0	0	-178	-5.1	-4.6	-0.03	0.01	-0.02	-0.52	18	-100.248	-28.8264	-2.61311	-1.18473	-2.91947
52	0	-1.9	-36	-2.6	-1.81	-0.2	0	-0.6	0	12	5.94156	-36	-0.286039	-0.225976	-0.250325
	P VALUES	0.397771	0.224396	0.177973	0.157627	0.578365	0.538207	0.791545	0.978878	0.557316	0.543559	0.97893	0.245211	0.195627	0.315573
