# Supplementary material for: Clinical and molecular parameters associated to pneumonitis development in non-small-cell lung cancer patients receiving chemoimmunotherapy from NADIM trial
Source: HighWire-hosted journal article supplement (doi:10.1136/jitc-2021-002804), 2021-08-01
Supplement: jitc-2021-002804supp004_data_supplement.xlsx [file jitc-2021-002804supp004_data_supplement.xlsx]

## Sheet: PRE
Patient ID	PNEUMONITIS_0vsOther	Tissue Evenness PRE	Tissue Diversity PRE	Tissue Convergence PRE	PBMCs Evenness PRE	PBMCs Diversity PRE	PBMCs Convergence PRE
1	0	0.937552	9.28116	0.00293042
2	0	0.918167	8.73156	0.00452119
3	1
6	0
7	0	0.928179	12.1498	0.0293822
9	1
11	0
12	0	0.885884	8.0691	0
13	0	0.851598	9.91204	0.0388072
14	0	0.855858	9.46175	0.0118631
15	1
16	0
17	1
18	0
19	0
20	1				0.932137	13.3512	0.013023
21	0	0.954813	12.5875	0.00609909	0.907758	12.5922	0.0132145
22	0	0.894213	11.9841	0.0085805	0.849486	12.6386	0.00536977
23	0	0.954088	9.75459	0.0100763	0.947831	13.5327	0.0101961
24	0	0.911824	9.84113	0.0145907	0.702453	9.77493	0.0121926
26	0				0.815038	11.7275	0.0139982
27	1	0.871931	6.9901	0.0161142	0.792782	11.7501	0.00256656
28	0				0.892052	13.2268	0.00795452
29	1	0.949034	15.1163	0.0165699	0.820251	12.5398	0.0154156
30	0	0.909239	10.801	0.0216641
31	0	0.866765	8.93392	0.0112999	0.639195	8.37315	0.00109631
32	1				0.923933	13.0334	0.00467769
33	0				0.842148	11.4893	0.00298097
34	0	0.782402	9.9404	0.0488702	0.856862	12.5306	0.00559734
35	1				0.672811	9.7935	0.0530856
36	1				0.459565	6.12751	0.0311823
37	0	0.93447	8.07743	0	0.920272	13.5802	0.0175325
38	0	0.906221	11.6506	0.00788693	0.652925	9.76767	0.00662331
39	0				0.892384	13.0444	0.0724153
40	0				0.577427	8.1905	0.00856674
42	0				0.838004	11.9721	0.00830704
43	0	0.927555	9.08335	0	0.50627	7.2227	0.0342816
44	0				0.88416	12.985	0.0139208
45	1	0.930189	12.8391	0.00489492	0.771642	10.0137	0.0340979
46	0				0.88015	13.0773	0.00844308
47	0				0.785965	11.6863	0.00484329
48	1	0.811168	10.3647	0.0211895	0.909	12.3551	0.00346313
49	0				0.794163	10.2245	0.00172929
50	0				0.505462	7.29605	0.00235884
51	0	0.792869	8.97278	0.0147029	0.803414	11.9039	0.00570873
52	0	0.868907	7.80042	0.00407194	0.742278	10.2998	0.00788312
	P VALUES	0.864813	0.268452	0.306467	0.814605	0.962595	0.372897

## Sheet: POST
Patient ID	PNEUMONITIS_0vsOther	Tissue Evenness POST	Tissue Diversity POST	Tissue Convergence POST	PBMCs Evenness POST	PBMCs S. Diversity POST	PBMCs Convergence POST
1	0
2	0	0.867783	9.91688	0.0591049
3	1	0.879306	6.89306	0
6	0	0.899027	11.7746	0.00230375
7	0	0.901744	9.82707	0.0129166
9	1	0.839104	9.53798	0.0192956
11	0
12	0	0.947377	6.72451	0
13	0	0.903048	8.86809	0.0149149
14	0	0.946342	8.06621	0
15	1	0.91467	9.11276	0.0064798	0.811082	11.8812	0.0179903
16	0	0.803701	9.67816	0.0176978	0.840316	12.2557	0.0165235
17	1	0.897539	9.32751	0.00745831	0.705018	10.3144	0.0147556
18	0
19	0	0.9073	9.6416	0.00036179	0.850383	12.7646	0.0246079
20	1	0.860082	10.1248	0.102715	0.931349	13.6952	0.0149247
21	0	0.949005	9.99803	0.012017	0.869337	12.9018	0.00838745
22	0	0.956399	7.47921	0	0.879454	12.9126	0.0103158
23	0	0.896974	10.6184	0.0116232	0.939055	13.6952	0.00815985
24	0	0.933667	11.3241	0.0187076	0.58321	8.19018	0.00809572
26	0	0.943062	10.4562	0.00126698	0.838417	12.1024	0.0149997
27	1	0.89662	7.4616	0.0252591	0.837178	11.9965	0.00227271
28	0	0.84241	8.68	0.169689	0.815111	11.7348	0.0103824
29	1	0.898151	9.76737	0.0412336	0.793571	12.1161	0.0142719
30	0	0.953828	11.4739	0.0175831	0.938846	13.713	0.00691
31	0				0.722583	9.3466	0.00894101
32	1	0.889517	9.25555	0.0170301	0.878444	12.3027	0.00391889
33	0	0.871989	8.79847	0.00064242	0.459026	5.26743	0.00147836
34	0	0.925118	9.92144	0.0289684	0.71228	9.66317	0.0015901
35	1	0.794554	10.1734	0.0169193	0.590153	8.51574	0.0403726
36	1	0.936441	7.00815	0.0069811	0.472639	6.54299	0.0326572
37	0				0.893025	13.4851	0.0196667
38	0	0.934766	8.10338	0.021232	0.664289	9.95628	0.0050828
39	0	0.910283	9.23102	0	0.924149	14.3185	0.0492963
40	0	0.884045	9.4388	0.0272685	0.566903	8.39815	0.00573406
42	0				0.863374	12.2356	0.00538946
43	0	0.946086	9.23997	0.0117455	0.601096	8.74488	0.0266183
44	0				0.897768	13.3196	0.00538002
45	1	0.802167	8.50737	0.0046243	0.81343	11.4863	0.0194671
46	0	0.904991	9.55528	0.00132221	0.938141	14.1436	0.00604625
47	0	0.87956	8.67886	0.012432	0.764555	11.3796	0.00481165
48	1	0.898922	10.5275	0.0337241	0.892973	13.1153	0.004025
49	0	0.876757	7.68175	0	0.743139	11.3389	0.00464411
50	0	0.910235	8.68991	0.0069973	0.567021	8.18898	0.00384897
51	0	0.886668	5.79806	0	0.773428	11.3436	0.00571482
52	0				0.753778	10.5941	0.137045
	P VALUES	0.028	0.706	0.166	0.814605	0.962595	0.372897

## Sheet: POST-PRE
Patient ID	PNEUMONITIS_0vsOther	Tissue Evenness DIF	Tissue Diversity DIF	Tissue Convergence DIF	PBMCs Evenness DIF	PBMCs Diversity DIF	PBMCs Convergence DIF
1	0
2	0	-0.050384	1.18532	0.0545837
3	1
6	0
7	0	-0.0264348	-2.32275	-0.0164656
9	1
11	0	0.0614922	-1.34459	0
12	0	0.05145	-1.04395	-0.0238923
13	0	0.0904843	-1.39555	-0.0118631
14	0
15	1
16	0
17	1	-0.00580809	-2.58943	0.00591794
18	0	0.0621855	-4.50487	-0.0085805
19	0	-0.0571139	0.863802	0.00154687
20	1	0.0218429	1.48298	0.00411696	-0.000788	0.34404	0.00190172
21	0				-0.0384212	0.309518	-0.00482703
22	0				0.0299685	0.273977	0.00494602
23	0	0.0445889	0.672837	-0.00408098	-0.00877609	0.162536	-0.00203625
24	0				-0.119244	-1.58475	-0.00409693
26	0				0.0233792	0.374856	0.00100153
27	1	0.142716	-0.0189612	-0.0199018	0.0443955	0.246386	-0.00029385
28	0				-0.0769407	-1.49202	0.00242783
29	1	0.0285446	-3.54721	0.0133451	-0.0266799	-0.423669	-0.00114369
30	0
31	0				0.0833879	0.973454	0.0078447
32	1				-0.0454884	-0.730665	-0.0007588
33	0	0.0185304	0.156619	0.0117455	-0.383122	-6.22186	-0.00150261
34	0				-0.144582	-2.86748	-0.00400724
35	1				-0.0826586	-1.27775	-0.012713
36	1				0.0130745	0.415482	0.0014749
37	0				-0.0272462	-0.095129	0.00213423
38	0				0.0113634	0.188608	-0.00154051
39	0	0.0937986	-3.17472	-0.0147029	0.031765	1.27406	-0.023119
40	0				-0.0105233	0.207651	-0.00283268
42	0				0.02537	0.263433	-0.00291758
43	0				0.0948261	1.52218	-0.00766336
44	0				0.0136077	0.334615	-0.00854074
45	1				0.0417881	1.47268	-0.0146308
46	0	0.0246887	0.471501	0.00914491	0.0579912	1.06622	-0.00239683
47	0	-0.0508836	-5.34896	0.0246637	-0.0214105	-0.306685	-3.164e-05
48	1				-0.0160273	0.760209	0.00056187
49	0				-0.0510239	1.11441	0.00291482
50	0				0.0615595	0.892924	0.00149013
51	0	-0.128021	-4.33176	-0.00027062	-0.0299856	-0.560233	6.09e-06
52	0	0.0877532	0.162811	0.0125346	0.0114996	0.294304	0.129162
	P VALUES	0.288	0.457	0.111	0.888	0.888	0.815

## Sheet: Expanded-Contracted clones
Patient ID	PNEUMONITIS_0vsOther	Tissue % expanded	Tissue % contracted	Tissue Clonal Space expanded	Tissue Clonal Space contracted	PBMCs % expanded	PBMCs % contracted	PBMCs Clonal Space expanded	PBMCs Conal Space contracted
1	0
2	0	79.2285	20.7715	0.0639898	0.93601
3	1
6	0
7	0	17.9215	82.0785	0.0855116	0.914484
9	1
11	0
12	0	19.6746	80.3254	0.0177585	0.982241
13	0	22.2563	77.7437	0.0720723	0.927928
14	0	14.8133	85.1867	0.0479237	0.952076
15	1
16	0
17	1
18	0
19	0
20	1					56.72	43.28	0.10362	0.896378
21	0	13.8803	86.1197	0.0297089	0.970291	66.8786	33.1214	0.144696	0.8553
22	0	2.00328	97.9967	0.0432992	0.956701	46.7947	53.2053	0.0953156	0.904672
23	0	75.2792	24.7208	0.0563899	0.94361	55.278	44.722	0.0646841	0.935325
24	0	71.7845	28.2155	0.0668746	0.933125	51.4586	48.5414	0.417265	0.582718
26	0					50.783	49.217	0.152351	0.847661
27	1	55.9199	44.0801	0.0338937	0.966106	41.5804	58.4196	0.0772556	0.922732
28	0					42.1394	57.8606	0.212883	0.787083
29	1	2.92645	97.0736	0.0473574	0.952632	49.296	50.704	0.204657	0.795248
30	0	53.2059	46.7941	0.0312592	0.968742
31	0					47.1814	52.8186	0.163386	0.836613
32	1					48.0277	51.9723	0.105969	0.894037
33	0					17.0512	82.9488	0.00317222	0.996828
34	0	20.4878	79.5122	0.0979919	0.902008	32.2849	67.7151	0.197389	0.802615
35	1					46.7542	53.2458	0.279388	0.720624
36	1					60.0175	39.9825	0.384683	0.615317
37	0					55.9159	44.0841	0.125114	0.874891
38	0	5.16634	94.8337	0.0912746	0.908726	50.7127	49.2873	0.278671	0.72133
39	0					64.7533	35.2467	0.0441282	0.955848
40	0					60.5925	39.4075	0.154277	0.845713
42	0					47.9926	52.0074	0.104053	0.895945
43	0	49.9101	50.0899	0.0503277	0.949672	54.9622	45.0378	0.0407123	0.959289
44	0					52.3652	47.6348	0.0884878	0.911518
45	1	9.74436	90.2556	0.0603751	0.939624	69.9371	30.0629	0.109153	0.890845
46	0					53.7934	46.2066	0.0863715	0.91366
47	0					49.8237	50.1763	0.246165	0.753832
48	1	32.6603	67.3397	0.091809	0.908191	68.4072	31.5928	0.110921	0.889079
49	0					84.4377	15.5623	0.14804	0.85196
50	0					50.4844	49.5156	0.105062	0.894947
51	0	3.40344	96.5966	0.0485614	0.951438	46.9576	53.0424	0.278067	0.721936
52	0					53.2198	46.7802	0.201223	0.798776
	P VALUES	0.673	0.673	0.673	0.673	0.671	0.671	1	1
